# Supplementary material for: Estimating long-term vaccine effectiveness against SARS-CoV-2 variants: a model-based approach
Source: PubMed Central journal article supplement (PMC10356855; doi:10.1038/s41467-023-39736-3), 2023-07-19
Supplement: 41467_2023_39736_MOESM1_ESM.pdf [file 41467_2023_39736_MOESM1_ESM.pdf]

## **Estimating long-term vaccine effectiveness against SARS-CoV-2 variants: a model-based approach.**

Alexandra B Hogan<sup>1,2</sup>, Patrick Doohan<sup>2</sup>, Sean L Wu<sup>3</sup>, Daniela Olivera Mesa<sup>2</sup>, Jaspreet Toor<sup>2</sup>, Oliver J Watson<sup>2,4</sup>, Peter Winskill<sup>2</sup>, Giovanni Charles<sup>2</sup>, Gregory Barnsley<sup>2,4</sup>, Eleanor M Riley<sup>5</sup>, David S Khoury<sup>6</sup>, Neil M Ferguson<sup>2</sup>, Azra C Ghani<sup>2</sup>

1. School of Population Health, Faculty of Medicine and Health, University of New South Wales, Sydney, NSW, Australia
2. MRC Centre for Global Infectious Disease Analysis, School of Public Health, Imperial College London, London, UK
3. Institute for Health Metrics and Evaluation, University of Washington, Seattle, USA
4. London School of Hygiene and Tropical Medicine, London, UK
5. Institute of Immunology and Infection Research, School of Biological Sciences, University of Edinburgh, UK
6. Kirby Institute, University of New South Wales, Sydney, NSW, Australia

### **Supplementary Data**

**Table S1: Estimated vaccine effectiveness against mild disease, hospitalisation and death for Oxford/AstraZeneca AZD1222, Pfizer-BioNTech BNT162b2 and Moderna mRNA-1273 vaccine regimens as a function of time since dose 2 or dose 3.** Estimates are shown for the Delta variant; estimates for the Omicron variant are shown in **Table 2**. The values are shown for each vaccine for dose 2 or dose 3; as the dose 3 estimates do not depend on dose 2 values, the estimates are applicable to either homologous or heterologous dosing. Values shown are the posterior median and 95% credible intervals. The comparator group is those that did not receive any vaccine dose. Grey shading indicates projected vaccine effectiveness beyond the time period of the data to which the model was fitted.

| Vaccine                    | Days post dose 2 |                  | Days post dose 3 |                  |                  |                  |                  |                  |                  |
|----------------------------|------------------|------------------|------------------|------------------|------------------|------------------|------------------|------------------|------------------|
|                            | 90               | 180              | 30               | 60               | 90               | 120              | 150              | 180              | 365              |
| <i>Mild disease</i>        |                  |                  |                  |                  |                  |                  |                  |                  |                  |
| Oxford/AstraZeneca AZD1222 | 56.5 (55.7-57.2) | 38.3 (37-39.2)   | 87.5 (84.1-90.1) | 80.2 (75.4-84.1) | 72.4 (66.4-77.3) | 65.3 (58.7-71)   | 59.7 (52.5-65.8) | 55.6 (48.2-61.9) | 43.7 (35.3-51)   |
| Moderna mRNA-1273          | 82.7 (81.9-83.1) | 69.5 (67.9-70.4) | 94.4 (94.1-94.6) | 90.7 (90.2-91)   | 86.2 (85.5-86.7) | 81.8 (80.8-82.4) | 78 (76.7-78.8)   | 74.9 (73.4-75.9) | 65.1 (60-67.7)   |
| Pfizer-BioNTech BNT162b2   | 76 (75.3-76.3)   | 60.1 (58.8-60.8) | 92.7 (92.4-92.9) | 88 (87.5-88.3)   | 82.6 (81.9-83)   | 77.3 (76.4-77.9) | 72.8 (71.7-73.6) | 69.4 (67.8-70.3) | 58.5 (53.1-61.3) |
| <i>Hospitalisation</i>     |                  |                  |                  |                  |                  |                  |                  |                  |                  |
| Oxford/AstraZeneca AZD1222 | 90.7 (90.2-91.1) | 82.4 (81.1-83.2) | 98.1 (97.6-98.6) | 96.8 (95.9-97.6) | 95.2 (93.7-96.3) | 93.4 (91.4-94.9) | 91.8 (89.2-93.6) | 90.4 (87.4-92.5) | 85.4 (80-88.8)   |
| Moderna mRNA-1273          | 97.3 (97.1-97.5) | 94.5 (93.9-94.8) | 99.2 (99.1-99.3) | 98.7 (98.5-98.7) | 97.9 (97.7-98)   | 97.1 (96.9-97.3) | 96.4 (96-96.6)   | 95.7 (95.3-96.1) | 93.3 (91.7-94.2) |
| Pfizer-BioNTech BNT162b2   | 96 (95.7-96.2)   | 91.9 (91.2-92.3) | 99 (98.9-99)     | 98.2 (98.1-98.3) | 97.3 (97.1-97.4) | 96.2 (95.9-96.4) | 95.3 (94.9-95.5) | 94.5 (93.9-94.8) | 91.4 (89.3-92.4) |
| <i>Death</i>               |                  |                  |                  |                  |                  |                  |                  |                  |                  |
| Oxford/AstraZeneca AZD1222 | 90.5 (89.1-91.7) | 82 (79.5-84.1)   | 98.1 (97.3-98.6) | 96.8 (95.5-97.6) | 95.1 (93.2-96.3) | 93.2 (90.7-94.9) | 91.6 (88.5-93.6) | 90.2 (86.5-92.5) | 85.1 (79.5-88.6) |
| Moderna mRNA-1273          | 97.2 (96.7-97.6) | 94.3 (93.3-95.1) | 99.2 (99-99.3)   | 98.6 (98.4-98.8) | 97.9 (97.5-98.1) | 97.1 (96.5-97.4) | 96.3 (95.6-96.8) | 95.6 (94.8-96.2) | 93.2 (91.3-94.3) |
| Pfizer-BioNTech BNT162b2   | 95.9 (95.2-96.4) | 91.7 (90.3-92.8) | 98.9 (98.7-99.1) | 98.2 (97.8-98.4) | 97.2 (96.7-97.6) | 96.2 (95.4-96.6) | 95.2 (94.3-95.8) | 94.3 (93.3-95)   | 91.2 (88.8-92.7) |

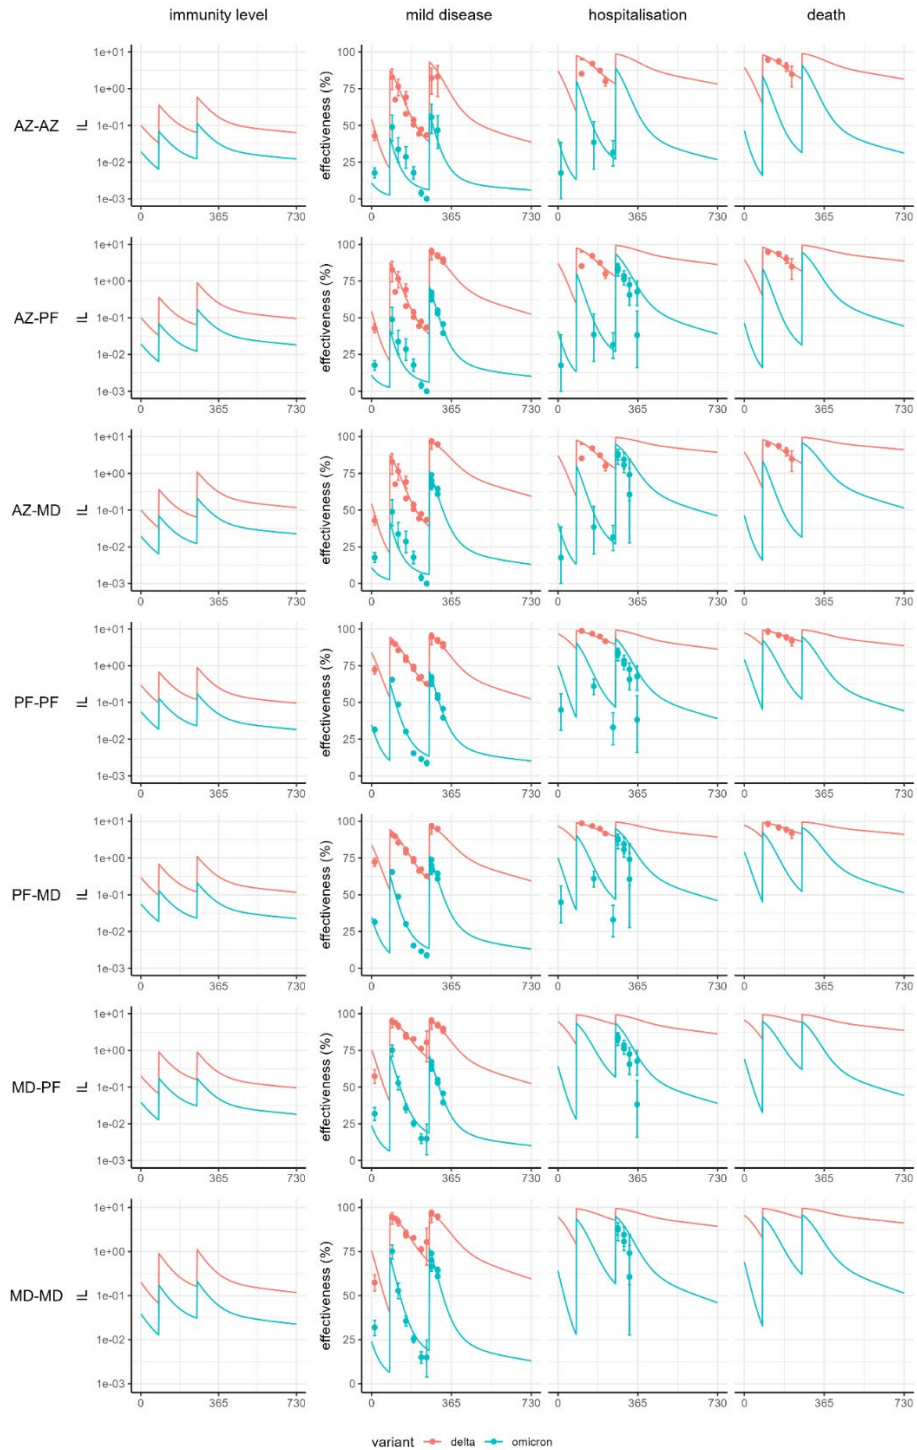

**Figure S1: Projected vaccine effectiveness over time (in days) since the first vaccine dose for combinations of schedules for the Oxford/AstraZeneca AZD1222 (AZ), Pfizer-BioNTech BNT162b2 (PF) and Moderna mRNA-1273 (MD) vaccines using data from 18-64 age-group where only stratified data were available.** Plots show immunity level (IL) in the left column, alongside effectiveness against mild disease, hospitalisation, and death on the right. Neutralization and protection against the Delta and Omicron variants are shown in red and blue respectively. Seven regimens are shown: AZ delivered for three doses (AZ-AZ); two doses of AZ and a third dose of PF (AZ-PF); two doses of AZ and a third dose of MD (AZ-MD); PF delivered for three doses (PF-PF); two doses of PF and a third dose of MD (PF-MD); two doses of MD and a third dose of PF (MD-PF); and MD delivered for three doses (MD-MD). The solid lines show the posterior median fitted model estimate, and the points show estimates of mean vaccine effectiveness (and associated 95% confidence intervals) against three endpoints using data from England<sup>24-26</sup>. Sample sizes for each of the 143 data points vary according to the uptake of combinations and length of follow-up; these are provided in the data files.

**Table S2: Estimated vaccine effectiveness against mild disease, hospitalisation and death for Oxford/AstraZeneca AZD1222, Pfizer-BioNTech BNT162b2 and Moderna mRNA-1273 vaccine regimens as a function of time since dose 2 or dose 3.** Estimates are shown for the Omicron variant using the data from the 18-65 age-group where only age-stratified data were available. Values shown are the posterior median and 95% credible intervals. The comparator group is those that did not receive any vaccine dose.

| Vaccine                    | Days post dose 2 |                  | Days post dose 3 |                  |                  |                  |                  |                  |                  |
|----------------------------|------------------|------------------|------------------|------------------|------------------|------------------|------------------|------------------|------------------|
|                            | 90               | 180              | 30               | 60               | 90               | 120              | 150              | 180              | 365              |
| <i>Mild disease</i>        |                  |                  |                  |                  |                  |                  |                  |                  |                  |
| Oxford/AstraZeneca AZD1222 | 12.1 (11.7-12.6) | 6 (5.7-6.3)      | 42.1 (35.7-48.8) | 29.8 (24.6-35.6) | 21.5 (17.3-26.2) | 16.3 (12.9-20.3) | 13.2 (10.4-16.5) | 11.3 (8.8-14.2)  | 7.1 (5.1-9.3)    |
| Moderna mRNA-1273          | 32.9 (31.9-33.9) | 18.6 (17.5-19.4) | 63.1 (62.2-63.8) | 49.9 (48.7-50.9) | 39.1 (37.8-40.2) | 31.4 (30.2-32.5) | 26.3 (25.1-27.3) | 23 (21.6-24)     | 15.2 (12.5-17.1) |
| Pfizer-BioNTech BNT162b2   | 24.8 (24.1-25.3) | 13.3 (12.6-13.8) | 56.2 (55.6-56.7) | 42.8 (42.1-43.5) | 32.5 (31.8-33.3) | 25.6 (24.8-26.4) | 21.1 (20.3-21.9) | 18.3 (17.4-19.1) | 11.9 (9.7-13.4)  |
| <i>Hospitalisation</i>     |                  |                  |                  |                  |                  |                  |                  |                  |                  |
| Oxford/AstraZeneca AZD1222 | 44 (42.7-45.5)   | 26.7 (25.3-28.1) | 80.5 (76-84.6)   | 70.7 (64.8-76.1) | 60.8 (54.1-67.2) | 52.5 (45.7-59.3) | 46.3 (39.5-53)   | 41.9 (35.2-48.5) | 30.2 (23.2-37)   |
| Moderna mRNA-1273          | 73.6 (72.4-74.8) | 56.4 (54.4-58.3) | 90.7 (90.2-91.1) | 85 (84.2-85.7)   | 78.5 (77.4-79.5) | 72.2 (70.8-73.6) | 67 (65.3-68.6)   | 62.9 (60.9-64.7) | 50.5 (44.7-54.3) |
| Pfizer-BioNTech BNT162b2   | 65.2 (64-66.4)   | 46.5 (44.7-48.2) | 87.9 (87.4-88.5) | 81 (80.2-81.7)   | 73.3 (72.3-74.3) | 66.1 (64.9-67.4) | 60.4 (58.8-61.9) | 56 (54.1-57.8)   | 43.3 (37.8-47.2) |
| <i>Death</i>               |                  |                  |                  |                  |                  |                  |                  |                  |                  |
| Oxford/AstraZeneca AZD1222 | 49.3 (45.7-53.5) | 31.1 (27.9-34.7) | 83.7 (79.1-87.5) | 74.9 (68.8-80.3) | 65.8 (58.6-72.6) | 57.9 (50.2-65.5) | 51.7 (43.9-59.6) | 47.2 (39.4-55.2) | 35 (26.7-43.5)   |
| Moderna mRNA-1273          | 77.6 (75-80.4)   | 61.6 (57.9-65.5) | 92.3 (91.2-93.4) | 87.5 (85.8-89.2) | 81.9 (79.5-84.2) | 76.4 (73.5-79.1) | 71.6 (68.3-74.7) | 67.8 (64.1-71.1) | 55.8 (49.4-61.1) |
| Pfizer-BioNTech BNT162b2   | 69.9 (66.7-73.2) | 51.9 (48-55.9)   | 90 (88.7-91.4)   | 84.1 (82.1-86.2) | 77.3 (74.6-80.1) | 70.8 (67.6-74.2) | 65.4 (61.8-69.1) | 61.2 (57.4-65.2) | 48.7 (42.4-54.2) |

**Table S3: Statistical fit of the main model and the two sensitivity analyses to assumed model structure.** Statistics are reported from the sampling phase of the MCMC chain discarding the burn-in period.

| Model                | Number of parameters | LogLikelihood (Mean) | LogLikelihood (SE) |
|----------------------|----------------------|----------------------|--------------------|
| Main                 | 17                   | -79,474              | 3.05               |
| Alternative Severity | 17                   | -79,464              | 3.03               |
| Additive Boost       | 17                   | -79,849              | 3.30               |

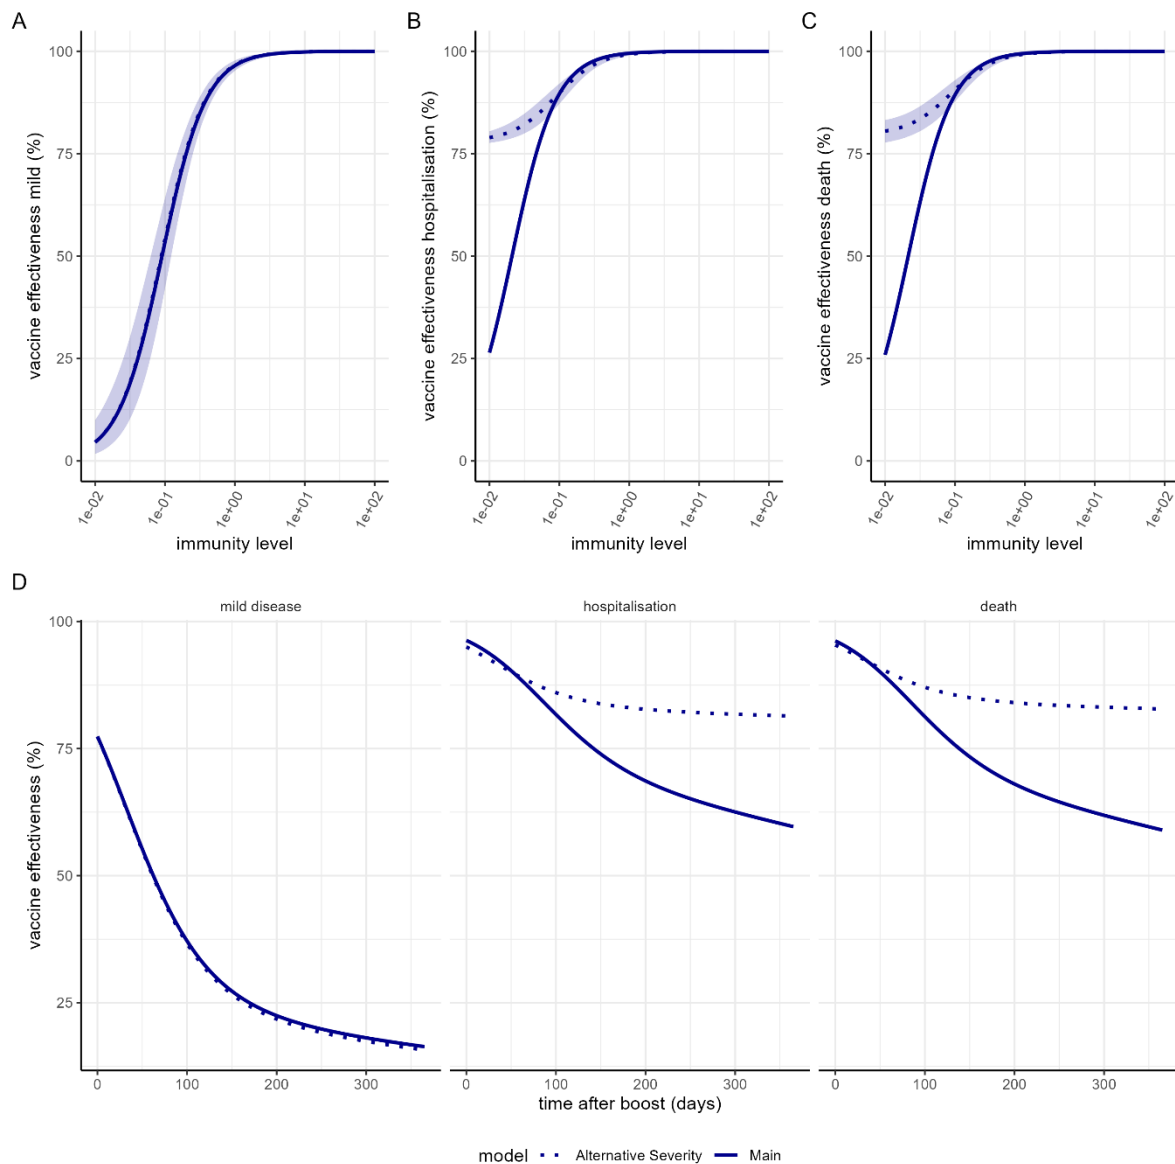

**Figure S2: Fitted relationships for the alternative severity model.** Dose-response curves estimated from fitting to vaccine effectiveness data for the relationship between immunity level (IL, x-axis) and vaccine effectiveness against mild disease (A), hospitalisation (B) and death (C) against the Omicron/BA.1 variant. The dashed lines show the posterior median estimates and colour bands the 95% credible interval. The solid lines show the dose-response curves using the main model. (D) Projected vaccine effectiveness for the Moderna mRNA-1273 vaccine from time since dose 3 for the main model (solid line) and the alternative severity model (dashed line). The values are for the posterior median estimates.

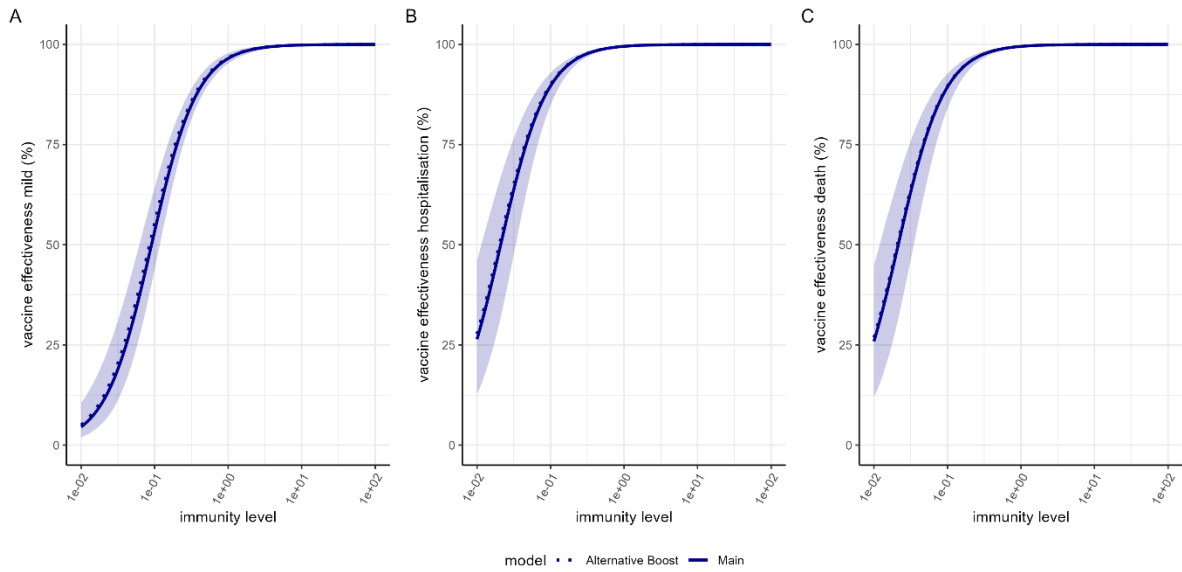

**Figure S3: Fitted relationships for the additive boosting model.** Dose-response curves estimated from fitting to vaccine effectiveness data for the relationship between immunity level (IL, x-axis) and vaccine effectiveness against mild disease (A), hospitalisation (B) and death (C) against the Omicron/BA.1 variant. The dashed lines show the posterior median estimates and colour bands the 95% credible interval. The solid lines show the dose-response curves using the main model. Given the overlap between the estimated relationships, vaccine effectiveness estimates are similar to those from the main model.

**Table S4: Estimated vaccine effectiveness against mild disease, hospitalisation and death for Oxford/AstraZeneca AZD1222, Pfizer-BioNTech BNT162b2 and Moderna mRNA-1273 vaccine regimens as a function of time since dose 2 or dose 3.** Estimates are shown for the Omicron variant with the ancestral vaccines for the alternative severity model. The values are shown for each vaccine for dose 2 or dose 3; as the dose 3 estimates do not depend on dose 2 values, the estimates are applicable to either homologous or heterologous dosing. Values shown are the posterior median and 95% credible intervals. The comparator group is those who did not receive any vaccine dose. Grey shading indicates projected vaccine effectiveness beyond the time period of the data to which the model was fitted.

| Vaccine                    | Days post dose 2 |                  | Days post dose 3 |                  |                  |                  |                  |                  |                  |
|----------------------------|------------------|------------------|------------------|------------------|------------------|------------------|------------------|------------------|------------------|
|                            | 90               | 180              | 30               | 60               | 90               | 120              | 150              | 180              | 365              |
| <i>Mild disease</i>        |                  |                  |                  |                  |                  |                  |                  |                  |                  |
| Oxford/AstraZeneca AZD1222 | 11.9 (11.4-12.3) | 5.9 (5.6-6.2)    | 42.1 (35.4-49.1) | 29.5 (24-35.9)   | 21.2 (16.7-26.5) | 16.1 (12.5-20.4) | 13 (10.1-16.7)   | 11.2 (8.6-14.5)  | 7.2 (5.1-9.5)    |
| Moderna mRNA-1273          | 33 (31.8-33.9)   | 18.7 (17.5-19.6) | 63.6 (62.5-64.2) | 50.2 (48.8-51)   | 39.2 (37.8-40.2) | 31.5 (30.2-32.5) | 26.5 (25.1-27.4) | 23.2 (21.8-24.3) | 15.7 (12.7-17.5) |
| Pfizer-BioNTech BNT162b2   | 24.8 (24-25.3)   | 13.4 (12.6-13.8) | 56.6 (55.8-57)   | 42.9 (41.9-43.5) | 32.5 (31.4-33.2) | 25.6 (24.5-26.2) | 21.2 (20.1-21.9) | 18.4 (17.2-19.2) | 12.2 (9.8-13.8)  |
| <i>Hospitalisation</i>     |                  |                  |                  |                  |                  |                  |                  |                  |                  |
| Oxford/AstraZeneca AZD1222 | 80.5 (79.5-81.6) | 79.2 (78.1-80.3) | 87.2 (85.6-88.8) | 84.4 (83-86)     | 82.6 (81.2-84)   | 81.5 (80.2-82.7) | 80.8 (79.6-82)   | 80.4 (79.2-81.6) | 79.5 (78.3-80.6) |
| Moderna mRNA-1273          | 85.2 (84.3-86)   | 82.1 (81-83)     | 92 (91.4-92.4)   | 89 (88.3-89.6)   | 86.6 (85.8-87.3) | 84.9 (84-85.7)   | 83.8 (82.8-84.6) | 83 (82-84)       | 81.4 (80.1-82.4) |
| Pfizer-BioNTech BNT162b2   | 83.4 (82.4-84.2) | 80.9 (79.8-81.9) | 90.4 (89.8-90.9) | 87.4 (86.7-88)   | 85.1 (84.2-85.8) | 83.6 (82.6-84.4) | 82.6 (81.6-83.5) | 82 (80.9-82.9)   | 80.6 (79.4-81.7) |
| <i>Death</i>               |                  |                  |                  |                  |                  |                  |                  |                  |                  |
| Oxford/AstraZeneca AZD1222 | 82 (79.4-84.2)   | 80.8 (78-83.2)   | 88.2 (85.8-90.2) | 85.6 (83.1-87.8) | 83.9 (81.3-86.1) | 82.9 (80.2-85.1) | 82.3 (79.4-84.6) | 81.9 (79-84.2)   | 81.1 (78.1-83.5) |
| Moderna mRNA-1273          | 86.3 (84.3-88)   | 83.4 (80.9-85.4) | 92.6 (91.4-93.5) | 89.8 (88.3-91.1) | 87.6 (85.7-89.1) | 86 (83.9-87.7)   | 85 (82.7-86.9)   | 84.3 (81.9-86.3) | 82.8 (80-84.9)   |
| Pfizer-BioNTech BNT162b2   | 84.7 (82.3-86.5) | 82.3 (79.7-84.5) | 91.2 (89.8-92.2) | 88.4 (86.6-89.7) | 86.2 (84.2-87.9) | 84.8 (82.5-86.6) | 83.9 (81.5-85.9) | 83.4 (80.8-85.4) | 82.1 (79.3-84.3) |



**Table S5: Estimated vaccine effectiveness against mild disease, hospitalisation and death for Oxford/AstraZeneca AZD1222, Pfizer-BioNTech BNT162b2 and Moderna mRNA-1273 vaccine regimens as a function of time since dose 2 or dose 3.** Estimates are shown for the Omicron variant with the ancestral vaccines for the additive boosting model. The values are shown for each vaccine for dose 2 or dose 3; as the dose 3 estimates do not depend on dose 2 values, the estimates are applicable to either homologous or heterologous dosing. Values shown are the posterior median and 95% credible intervals. The comparator group is those who did not receive any vaccine dose. Grey shading indicates projected vaccine effectiveness beyond the time period of the data to which the model was fitted.

| Vaccine                    | Days post dose 2 |                  | Days post dose 3 |                  |                  |                  |                  |                  |                  |
|----------------------------|------------------|------------------|------------------|------------------|------------------|------------------|------------------|------------------|------------------|
|                            | 90               | 180              | 30               | 60               | 90               | 120              | 150              | 180              | 365              |
| <i>Mild disease</i>        |                  |                  |                  |                  |                  |                  |                  |                  |                  |
| Oxford/AstraZeneca AZD1222 | 15.1 (14.5-15.5) | 7.5 (7-7.8)      | 71.4 (61-80.4)   | 58.8 (47.3-70.2) | 47.5 (36.3-60)   | 39 (28.6-51.4)   | 33.1 (23.8-44.9) | 29.2 (20.6-40.4) | 20.2 (13.1-29)   |
| Moderna mRNA-1273          | 34.1 (33-35)     | 19 (17.9-19.9)   | 82.1 (75.8-87.4) | 72.4 (64.1-80)   | 62.5 (53.2-71.8) | 54 (44.2-64.2)   | 47.6 (38-58.1)   | 43.1 (33.9-53.4) | 31.7 (24-40.6)   |
| Pfizer-BioNTech BNT162b2   | 23.3 (22.6-23.8) | 12.1 (11.4-12.6) | 77.7 (70.4-84)   | 66.6 (57.5-75.1) | 55.8 (46.1-65.9) | 47.1 (37.6-57.7) | 40.8 (31.8-51.2) | 36.5 (28.1-46.2) | 26.1 (19.2-33.8) |
| <i>Hospitalisation</i>     |                  |                  |                  |                  |                  |                  |                  |                  |                  |
| Oxford/AstraZeneca AZD1222 | 56.3 (54.5-57.7) | 36.9 (34.8-38.5) | 94.8 (91.9-96.8) | 91.2 (86.7-94.5) | 86.8 (80.4-91.6) | 82.2 (74.1-88.5) | 78.2 (69-85.7)   | 74.9 (65-83.1)   | 64.7 (52.4-74.5) |
| Moderna mRNA-1273          | 78.9 (77.5-80)   | 63 (60.6-65)     | 97.1 (95.8-98.1) | 95 (92.8-96.7)   | 92.4 (89.1-94.9) | 89.5 (85.1-92.9) | 86.8 (81.6-90.9) | 84.6 (78.8-89.2) | 77.1 (69.2-83.2) |
| Pfizer-BioNTech BNT162b2   | 68.7 (67.2-69.9) | 50 (47.6-51.6)   | 96.2 (94.5-97.4) | 93.5 (90.7-95.7) | 90.2 (86-93.3)   | 86.6 (81.3-90.8) | 83.3 (77.1-88.3) | 80.6 (73.6-86.1) | 71.9 (63.1-78.8) |
| <i>Death</i>               |                  |                  |                  |                  |                  |                  |                  |                  |                  |
| Oxford/AstraZeneca AZD1222 | 55.1 (51.5-58.7) | 35.8 (32.1-39.5) | 94.5 (91.5-96.8) | 90.8 (86-94.5)   | 86.2 (79.5-91.5) | 81.5 (73.1-88.3) | 77.4 (67.8-85.4) | 74 (63.6-83)     | 63.6 (51.4-74.7) |
| Moderna mRNA-1273          | 78.2 (75.4-80.6) | 61.9 (57.7-65.6) | 96.9 (95.5-98)   | 94.8 (92.4-96.6) | 92 (88.5-94.7)   | 89 (84.4-92.7)   | 86.3 (80.7-90.6) | 84 (77.7-88.9)   | 76.3 (68.1-82.8) |
| Pfizer-BioNTech BNT162b2   | 67.7 (64.3-70.8) | 48.8 (44.6-52.7) | 96 (94.1-97.4)   | 93.2 (90.2-95.5) | 89.7 (85.3-93.1) | 86 (80.3-90.5)   | 82.7 (75.8-88)   | 79.9 (72.5-85.7) | 70.9 (61.6-78.4) |

**Table S6: Projected vaccine effectiveness against mild disease, hospitalisation and death from BA.1 for an ancestral vaccine (BNT162b2) and variant-adapted vaccine as a function of time since a fourth dose.**

Values shown are the posterior median and 95% credible intervals. The comparator group is those that did not receive any vaccine dose.

| Vaccine                  | Days post 4 <sup>th</sup> dose |                  |                  |                  |                  |                  |                  |
|--------------------------|--------------------------------|------------------|------------------|------------------|------------------|------------------|------------------|
|                          | 30                             | 60               | 90               | 120              | 150              | 180              | 365              |
| <i>Mild disease</i>      |                                |                  |                  |                  |                  |                  |                  |
| Pfizer-BioNTech BNT162b2 | 57.1 (56.2-57.4)               | 43.5 (42.5-44.1) | 33.2 (32.1-33.9) | 26.3 (25.3-27)   | 22 (20.9-22.6)   | 19.2 (18.1-19.9) | 12.9 (10.6-14.2) |
| Variant-adapted vaccine  | 74.3 (68-76.4)                 | 62.6 (55.1-65.2) | 51.9 (44.1-54.8) | 43.7 (36.1-46.7) | 37.9 (30.7-40.8) | 34 (27.2-36.7)   | 24.3 (17.9-27.1) |
| <i>Hospitalisation</i>   |                                |                  |                  |                  |                  |                  |                  |
| Pfizer-BioNTech BNT162b2 | 90.9 (90.3-91.3)               | 85.3 (84.3-85.9) | 78.9 (77.6-79.8) | 72.9 (71.2-74)   | 67.9 (65.8-69.2) | 64.1 (61.7-65.7) | 52.6 (46.9-56)   |
| Variant-adapted vaccine  | 95.6 (94.1-96.1)               | 92.6 (90.2-93.4) | 89 (85.5-90.2)   | 85.4 (80.9-86.9) | 82.1 (76.9-83.8) | 79.5 (73.7-81.4) | 70.7 (61.8-73.7) |
| <i>Death</i>             |                                |                  |                  |                  |                  |                  |                  |
| Pfizer-BioNTech BNT162b2 | 90.7 (89.1-91.8)               | 85 (82.7-86.6)   | 78.5 (75.5-80.8) | 72.4 (68.8-75.2) | 67.4 (63.4-70.5) | 63.5 (59.3-66.9) | 52 (45.4-56.6)   |
| Variant-adapted vaccine  | 95.5 (93.6-96.1)               | 92.5 (89.6-93.5) | 88.8 (84.7-90.4) | 85 (79.9-87.1)   | 81.7 (75.7-84.2) | 79.1 (72.5-81.8) | 70.2 (60.6-73.9) |

**Table S7: Projected vaccine effectiveness against mild disease, hospitalisation and death from BA.1 for an ancestral vaccine (AZD1222) and variant-adapted vaccine as a function of time since a fourth dose.**

Values shown are the posterior median and 95% credible intervals. The comparator group is those that did not receive any vaccine dose.

| Vaccine                    | Days post 4 <sup>th</sup> dose |                  |                  |                  |                  |                  |                  |
|----------------------------|--------------------------------|------------------|------------------|------------------|------------------|------------------|------------------|
|                            | 30                             | 60               | 90               | 120              | 150              | 180              | 365              |
| <i>Mild disease</i>        |                                |                  |                  |                  |                  |                  |                  |
| Oxford/AstraZeneca AZD1222 | 42.4 (35.8-48.9)               | 29.9 (24.4-35.7) | 21.6 (17.2-26.4) | 16.5 (13-20.4)   | 13.4 (10.4-16.8) | 11.6 (8.9-14.5)  | 7.5 (5.4-9.8)    |
| Variant-adapted vaccine    | 61.5 (51.6-67.3)               | 48 (38.2-54.4)   | 37.4 (28.5-43.5) | 30 (22.3-35.5)   | 25.2 (18.3-30.1) | 22.2 (15.8-26.6) | 15 (9.8-18.8)    |
| <i>Hospitalisation</i>     |                                |                  |                  |                  |                  |                  |                  |
| Oxford/AstraZeneca AZD1222 | 84.7 (80.7-88)                 | 76.2 (70.8-80.8) | 67.4 (61-73.1)   | 59.8 (52.6-66.2) | 53.9 (46.6-60.6) | 49.7 (42.2-56.5) | 38 (29.8-45.3)   |
| Variant-adapted vaccine    | 92.3 (88.8-94)                 | 87.4 (82.2-90.1) | 81.8 (75-85.4)   | 76.3 (68.2-80.6) | 71.7 (62.8-76.5) | 68.2 (58.5-73.3) | 57.1 (44.8-63.4) |
| <i>Death</i>               |                                |                  |                  |                  |                  |                  |                  |
| Oxford/AstraZeneca AZD1222 | 84.4 (79.3-87.8)               | 75.8 (68.9-80.7) | 66.8 (58.9-72.9) | 59.1 (50.8-66)   | 53.3 (44.6-60.5) | 49 (40.3-56.3)   | 37.4 (28.8-44.8) |
| Variant-adapted vaccine    | 92.1 (88.2-94)                 | 87.1 (81.2-90.2) | 81.4 (73.4-85.6) | 75.9 (66.5-81)   | 71.2 (61-77.1)   | 67.6 (56.8-73.9) | 56.5 (43.7-64)   |
